# Supplementary material for: Characterization of tau prion seeding activity and strains from formaldehyde-fixed tissue
Source: PubMed Central journal article supplement (PMC5461712; doi:10.1186/s40478-017-0442-8), 2017-06-07

**a**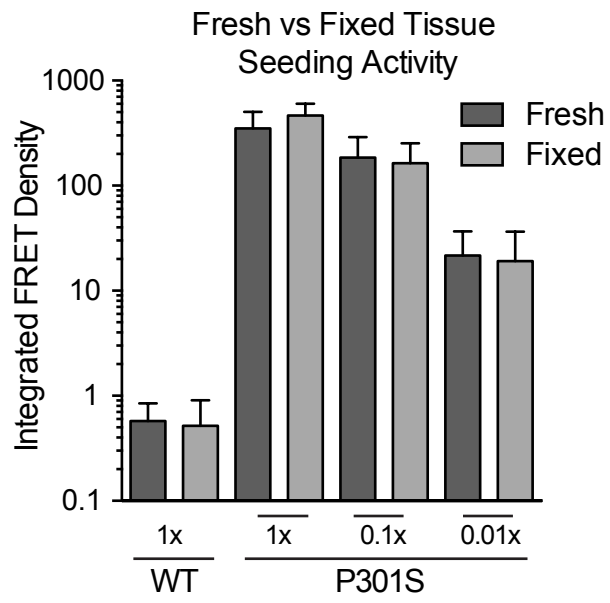**b**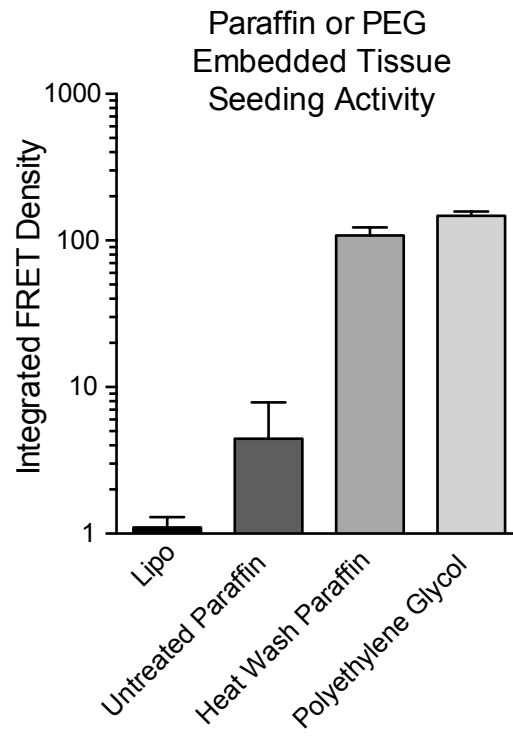

Supplement: 40478_2017_442_MOESM1_ESM.pdf [file 40478_2017_442_MOESM1_ESM.pdf]
