# Supplementary material for: Characterization of tau prion seeding activity and strains from formaldehyde-fixed tissue
Source: Springer Nature journal article supplement (doi:10.1186/s40478-017-0442-8), 2017-06-02

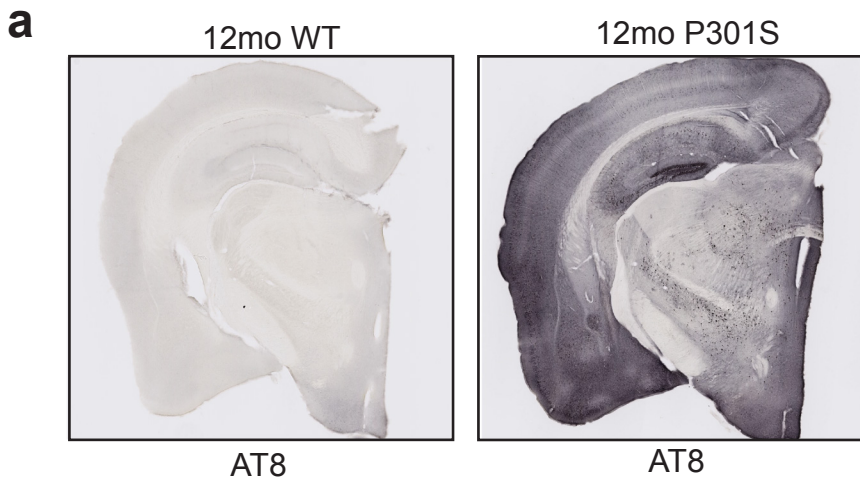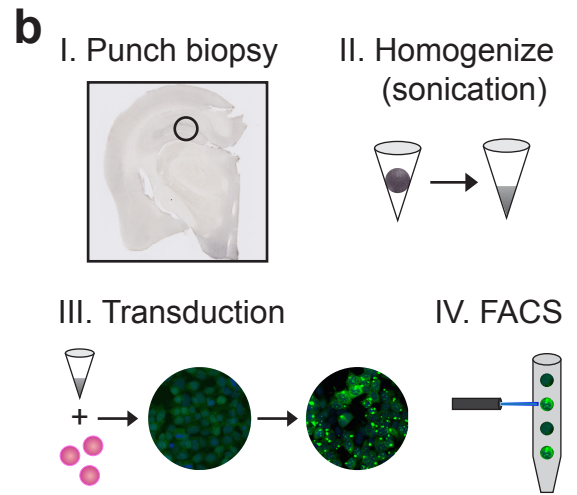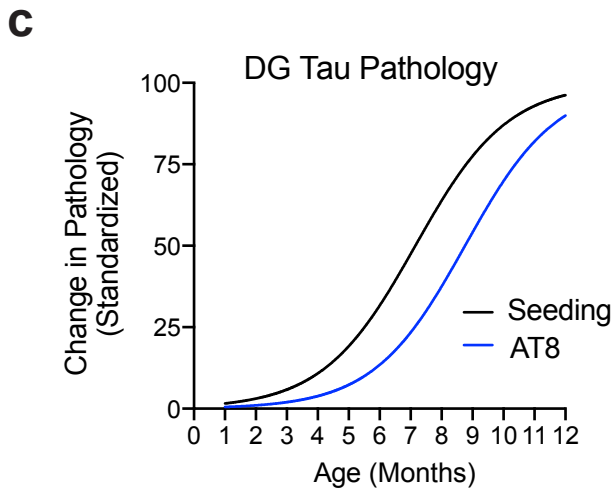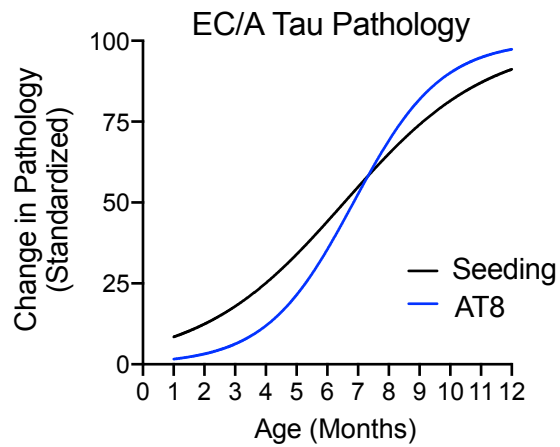

|          | Seeding  | AT8                  |
|----------|----------|----------------------|
| $S_{10}$ | 3.87 mos | 5.5 mos <sup>1</sup> |
| $S_{50}$ | 7.15 mos | 8.76 mos             |
| $R^2$    | 0.87     | 0.97                 |

|          | Seeding  | AT8      |
|----------|----------|----------|
| $S_{10}$ | 1.43 mos | 3.72 mos |
| $S_{50}$ | 6.55 mos | 6.85 mos |
| $R^2$    | 0.83     | 0.90     |

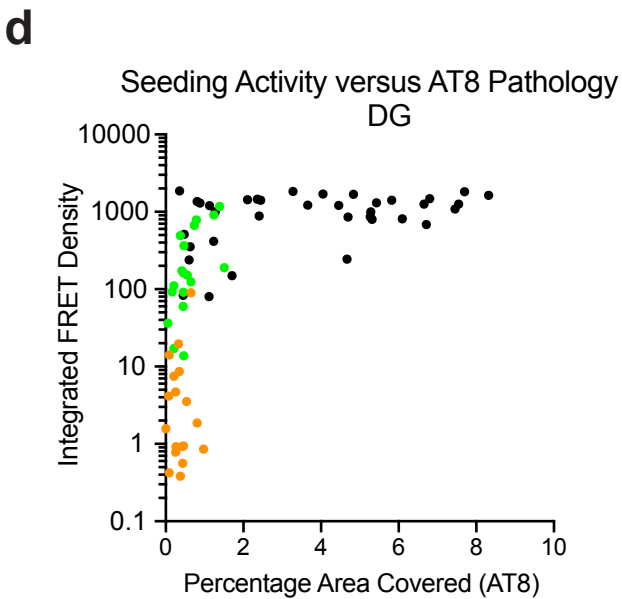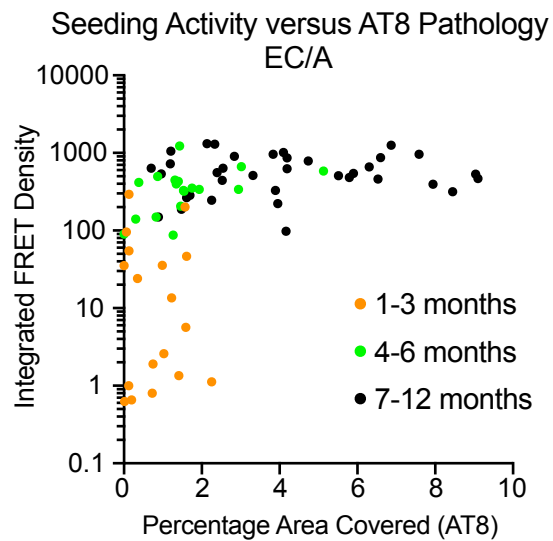

Supplement: MOESM2 [file 25666198]
